# Supplementary material for: Solvent-free synthesis of novel vanillidene derivatives of Meldrum's acid: biological evaluation, DNA and BSA binding study
Source: Royal Society of Chemistry journal article supplement (doi:10.1039/c6ra07711k), 2016-01-01
Supplement: c6ra07711k1.pdf [file c6ra07711k1.pdf]

**RSC Advance, Royal Society of Chemistry**

Electronic Supplementary Information associated with the paper

**Solvent-free synthesis of novel vanillidene derivatives of Meldrum's acid:  
biological evaluation, DNA and BSA binding study**

**Nenad Ž. Janković,<sup>\*a</sup> Jovana M. Muškinja,<sup>a</sup> Zoran R. Ratković,<sup>a</sup> Branislav Ranković,<sup>b</sup> Marijana  
Kosanić,<sup>b</sup> Zorica M. Bugarčić,<sup>a</sup> and Srđan Stefanović<sup>c</sup>**

<sup>a</sup>**Department of Chemistry, Faculty of Science, University of Kragujevac, Radoja Domanovića 12,  
P.O.Box 60, 34 000 Kragujevac, Serbia**

<sup>b</sup>**Department of Biology and Ecology, Faculty of Science, University of Kragujevac,  
Radoja Domanovića 12, 34000 Kragujevac, Serbia**

<sup>c</sup>**Institute of Meat Hygiene and Technology, Kačanskog 13, 11000 Belgrade, Serbia**

Corresponding author's e-mail address: [nenad.jankovic@kg.ac.rs](mailto:nenad.jankovic@kg.ac.rs)

Corresponding author's postal address: Faculty of Science, University of Kragujevac, Department of  
Chemistry, P.O. Box 60, 34000 Kragujevac, Serbia

Corresponding author's telephone and fax numbers: +381 34 336223

## Contents

|                                                                                                |          |
|------------------------------------------------------------------------------------------------|----------|
| <b>1. General</b>                                                                              |          |
| <b>1.1. General methods</b>                                                                    | <b>3</b> |
| <b>2. Substrate synthesis</b>                                                                  | <b>3</b> |
| <b>3. <math>^1\text{H}</math> and <math>^{13}\text{C}</math> NMR spectrum of compound 3a-j</b> | <b>4</b> |

# 1. General

## 1.1. General methods

### Experimental procedures for synthesis 5-(arylidanyl)-2,2-dimethyl-1,3-dioxane-4,6-diones

To a mortar are homogenized Meldrum's acid (1.58 g, 11 mmol), then vanillic aldehyde (10 mmol) and finally 5 mol% of PTSA (0.086 g, 0.5 mmol) was added at room temperature. Solid mixture very fast changed the color, white in light green. The reaction was followed by TLC (eluent  $\text{CHCl}_3$  : EtOAc 4:1). The solid washed with small portions of cold ethanol and then dried at room temperature to afford the desired product with good purity grade (without recrystallization).

## 2. Substrate synthesis

5-(4'-hydroxy-2'-iodo-3'-methoxybenzylidenyl)-2,2-dimethyl-1,3-dioxane-4,6-dione, **3a**

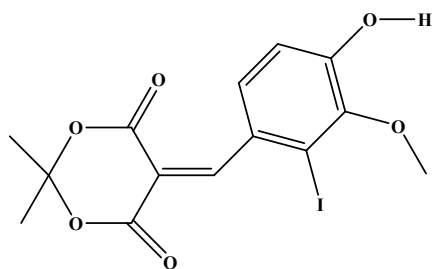

$\text{C}_{14}\text{H}_{13}\text{O}_6\text{I}$ ; 404.15 g/mol

According to general procedure 1.1 To a mortar are homogenized Meldrum's acid (1.58 g, 11 mmol), then iodovanillin (2.78 g, 10 mmol) and finally 5 mol% of PTSA (0.086 g, 0.5 mmol) was added at room temperature. Solid mixture very fast changed the color, white in light green. The reaction was followed by TLC (eluent  $\text{CHCl}_3$ :EtOAc 4:1). The solid washed with small portions of cold ethanol and then dried at room temperature to afford the desired product with

good purity grade (without recrystallization). The title compound was obtained in 95% yield.  
Mp=227-228°C

**IR (KBr):** 3283, 1739, 1703, 1566, 1496, 1418, 1398, 1292  $\text{cm}^{-1}$ .

**$^1\text{H}$  NMR (200 MHz, DMSO- $d_6$ ):**  $\delta$  = 1.73 (s, 6H), 3.86 (s, 3H), 8.01 (d, 1H,  $J$  = 1.8 Hz), 8.22 (s, 1H), 8.35 (d, 1H,  $J$  = 1.8Hz), 10.65 (br. s, 1H).

**$^{13}\text{C}$  NMR (50 MHz, DMSO- $d_6$ ):**  $\delta$  = 27.1, 56.4, 84.5, 104.3, 111.7, 117.8, 125.1, 139.1, 146.3, 152.4, 155.8, 160.4, 163.3.

**ESI-MS (70 eV):**  $m/z$  (%) = 427 [ $\text{M}^+ + \text{Na}$ ] (100%), 404 [ $\text{M}$ ] $^+$  (4.0%); 302 (48.6%), 277 (13.3%),

Anal. Calcd.  $\text{C}_{14}\text{H}_{13}\text{O}_6\text{I}$  (%): C 41.61, H 3.24; Found: C 41.49, H 3.31.

**3a**

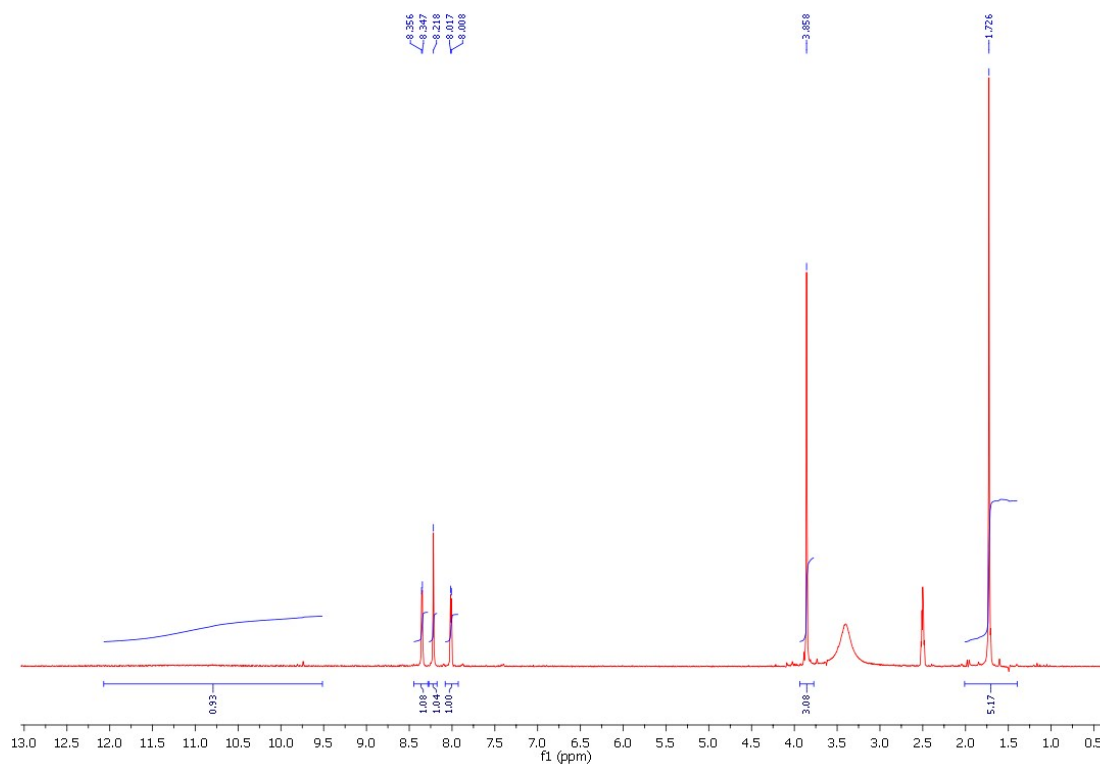

Figure S1  $^1\text{H}$  NMR spectrum of compound 3a

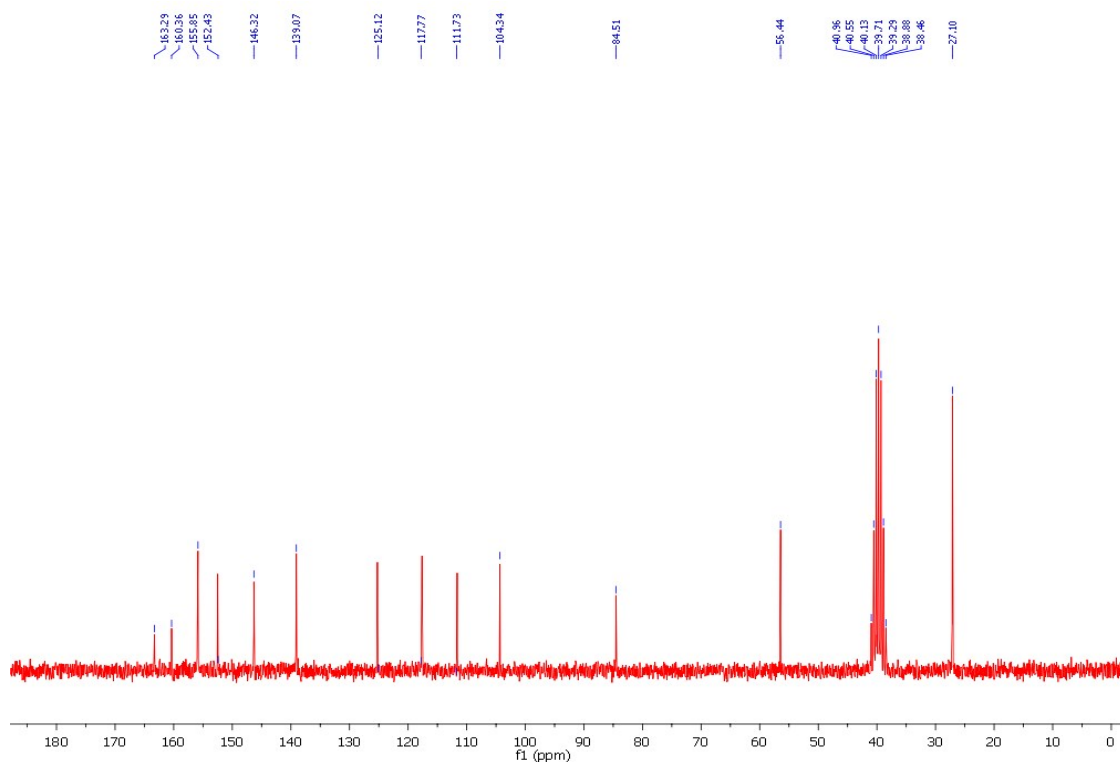

Figure S2  $^{13}\text{C}$  NMR spectrum of compound 3a

5-(3'-methoxy-4'-propoxybenzylidenyl)-2,2-dimethyl-1,3-dioxane-4,6-dione, **3b**

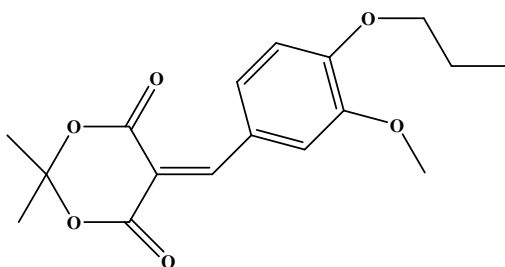

$\text{C}_{17}\text{H}_{20}\text{O}_6$ ; 320.34 g/mol

According to general procedure 1.1 To a mortar are homogenized Meldrum's acid (1.58 g, 11 mmol), then 3-methoxy-4-propoxybenzaldehyde (1.94 g, 10 mmol) and finally 5 mol% of PTSA (0.086 g, 0.5 mmol) was added at room temperature. Solid mixture very fast changed the color,

white in light green. The reaction was followed by TLC (eluent  $\text{CHCl}_3:\text{EtOAc}$  4:1). The solid washed with small portions of cold ethanol and then dried at room temperature to afford the desired product with good purity grade (without recrystallization). The title compound was obtained in 85% yield.  $\text{Mp}=147^\circ\text{C}$

**IR (KBr):** 1749, 1713, 1578, 1560, 1523, 1392, 1274  $\text{cm}^{-1}$ .

**$^1\text{H}$  NMR (200 MHz,  $\text{CDCl}_3$ ):**  $\delta$  = 1.07 (t, 3H,  $J$  = 7.6 Hz), 1.79 (s, 6H), 1.87-1.97 (m, 2H), 3.94 (s, 3H), 4.10 (t, 2H,  $J$  = 6.8 Hz), 6.94 (d, 1H,  $J$  = 8.6 Hz), 7.64 (dd,  $J$  = 8.6, 2.0 Hz, 1H), 8.29 (d, 1H,  $J$  = 2.2 Hz), 8.36 (s, 1H).

**$^{13}\text{C}$  NMR (50 MHz,  $\text{CDCl}_3$ ):**  $\delta$  = 10.3, 22, 27.4, 56.2, 70.6, 104, 110.3, 111.3, 116.1, 124.6, 132.6, 148.8, 154.7, 158.2, 160.6, 164.1.

**ESI-MS (70 eV):**  $m/z$  (%) = 320 (15.6%)  $[\text{M}]^+$ ; 277 (54.6%), 218 (100%), 130 (89.8%)

Anal. Calcd.  $\text{C}_{17}\text{H}_{20}\text{O}_6$  (%): C 63.74, H 6.29; Found: C 63.77, H 6.30.

### 3b

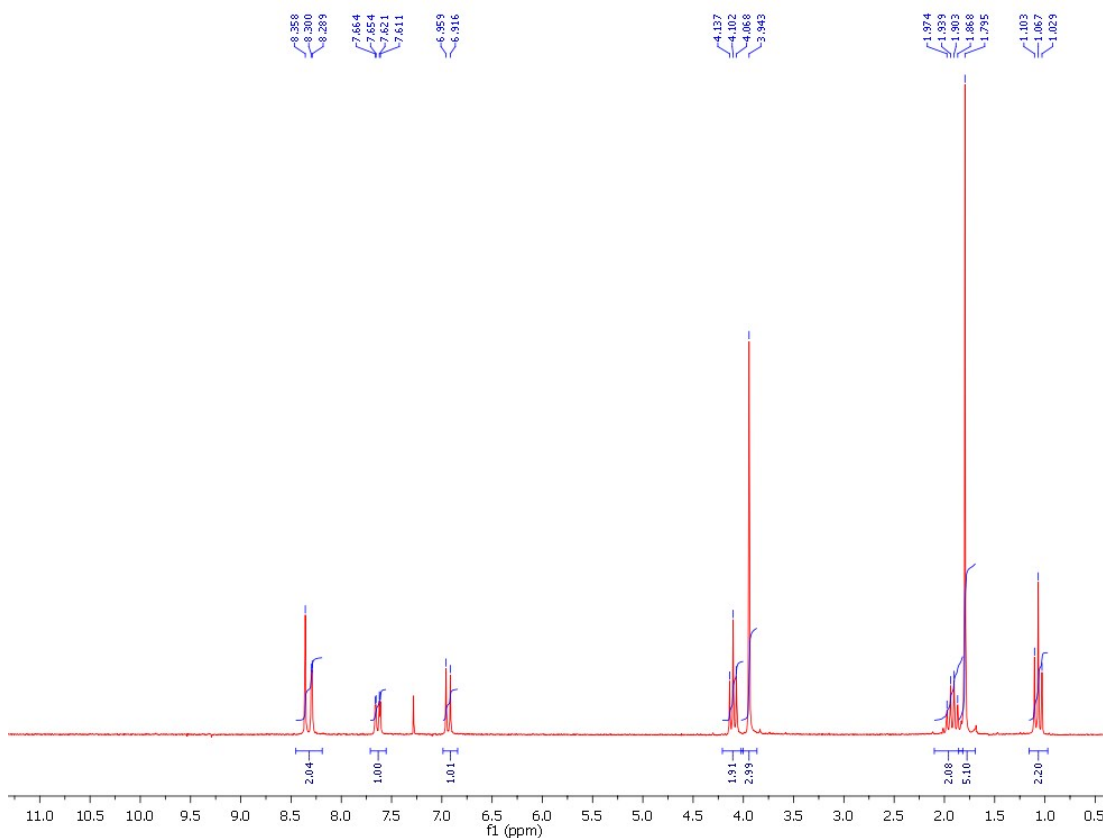

Figure S3  $^1\text{H}$  NMR spectrum of compound 3b

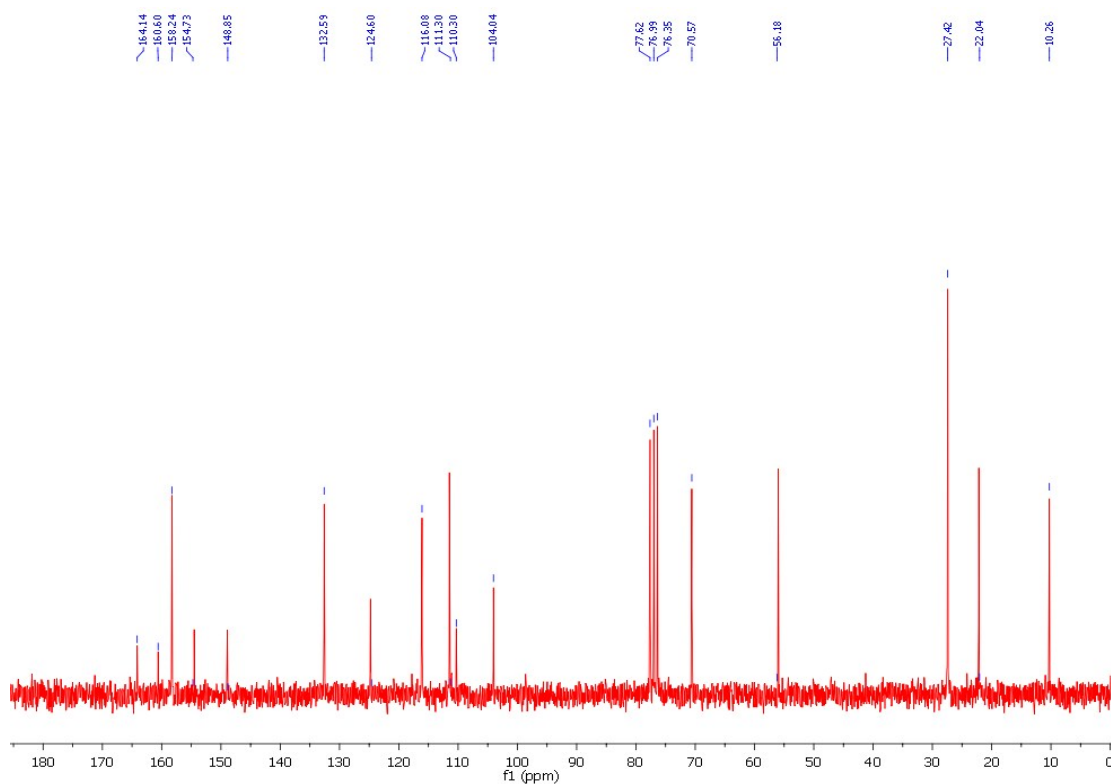

Figure S4  $^{13}\text{C}$  NMR spectrum of compound 3b

5-(4'-isopropoxy-3'-methoxybenzylidene)-2,2-dimethyl-1,3-dioxane-4,6-dione, **3c**

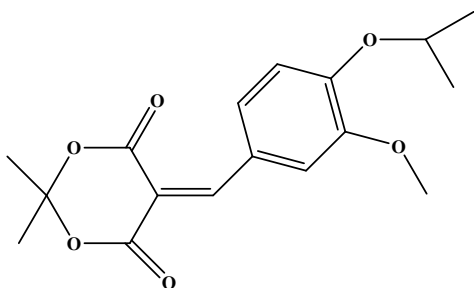

$\text{C}_{17}\text{H}_{20}\text{O}_6$ ; 320.34 g/mol

According to general procedure 1.1 To a mortar are homogenized Meldrum's acid (1.58 g, 11 mmol), then 4-isopropoxy-3-methoxybenzaldehyde (1.94 g, 10 mmol) and finally 5 mol% of PTSA (0.086 g, 0.5 mmol) was added at room temperature. Solid mixture very fast changed the

color, white in light green. The reaction was followed by TLC (eluent  $\text{CHCl}_3:\text{EtOAc}$  4:1). The solid washed with small portions of cold ethanol and then dried at room temperature to afford the desired product with good purity grade (without recrystallization). The title compound was obtained in 90% yield.  $\text{Mp}=151\text{-}152^\circ\text{C}$

**IR (KBr):** 1745, 1712, 1548, 1521, 1428, 1397, 1273  $\text{cm}^{-1}$ .

**$^1\text{H}$  NMR (200 MHz,  $\text{CDCl}_3$ ):**  $\delta$  = 1.45 (d, 6H,  $J$ = 6.2 Hz), 1.79 (s, 6H), 3.93 (s, 3H), 4.68-4.80 (m, 1H), 6.94 (d, 1H,  $J$  = 8.6 Hz), 7.64 (dd,  $J$  = 8.6, 2.2 Hz, 1H), 8.29 (d, 1H,  $J$  = 2.0 Hz), 8.36 (s, 1H).

**$^{13}\text{C}$  NMR (50 MHz,  $\text{CDCl}_3$ ):**  $\delta$  = 21.7, 27.4, 55.9, 71.6, 104, 110.3, 112.7, 116.1, 124.6, 132.3, 149.4, 153.4, 158.2, 160.6, 164.1.

**ESI-MS (70 eV):**  $m/z$  (%) = 320 (15.7%)  $[\text{M}]^+$ ; 277 (26.3%), 218 (100%), 150 (43.5%)

Anal. Calcd.  $\text{C}_{17}\text{H}_{20}\text{O}_6$  (%): C 63.74, H 6.29; Found: C 63.80, H 6.36.

### 3c

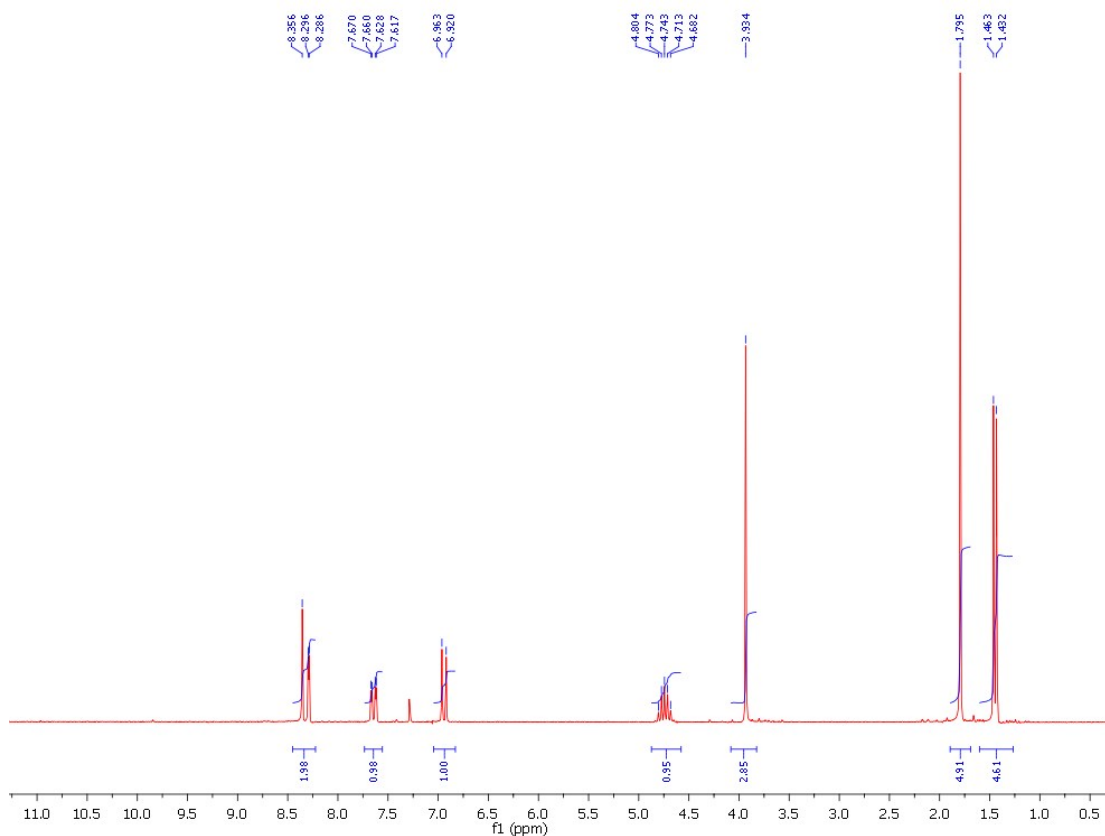



Figure S5 <sup>1</sup>H NMR spectrum of compound 3c

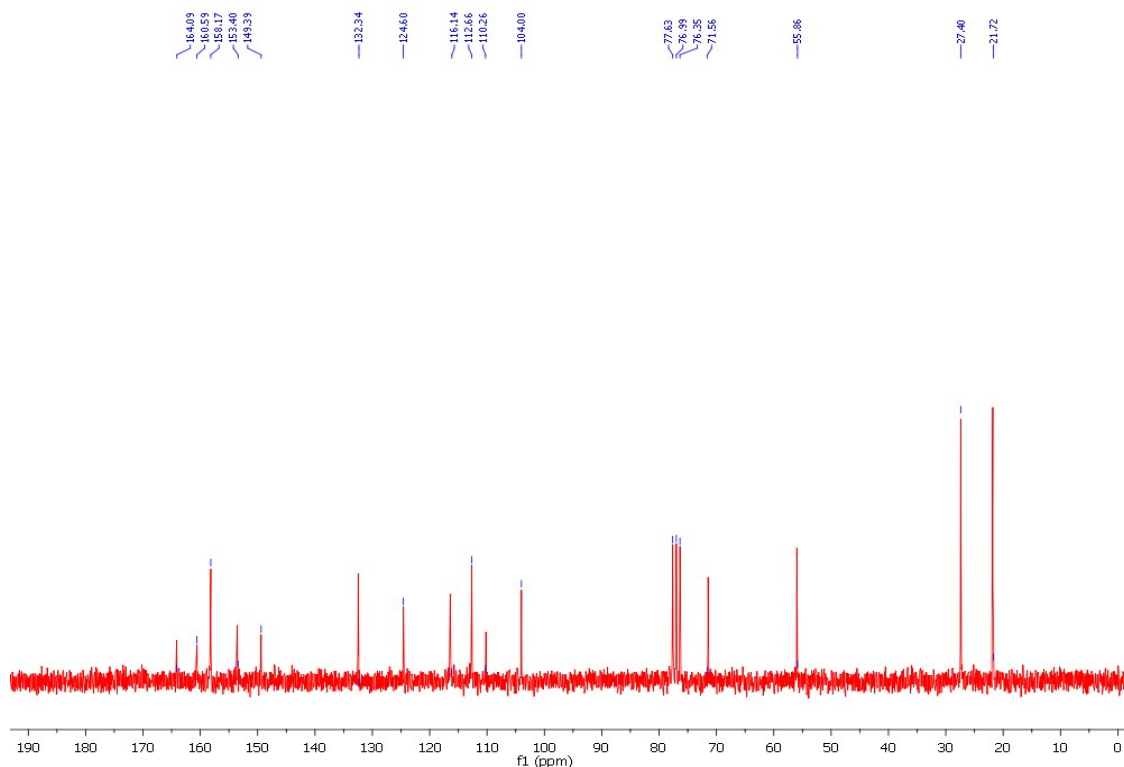

Figure S6 <sup>13</sup>C NMR spectrum of compound 3c

5-(4'-butoxy-3'-methoxybenzylidene)-2,2-dimethyl-1,3-dioxane-4,6-dione, **3d**

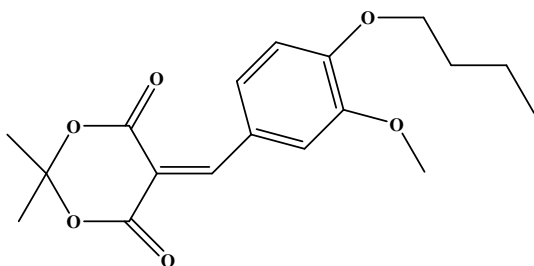

C<sub>18</sub>H<sub>22</sub>O<sub>6</sub>; 334.36 g/mol

According to general procedure 1.1 To a mortar are homogenized Meldrum's acid (1.58 g, 11 mmol), then 4-butoxy-3-methoxybenzaldehyde (2.08 g, 10 mmol) and finally 5 mol% of PTSA (0.086 g, 0.5 mmol) was added at room temperature. Solid mixture very fast changed the color, white in light green. The reaction was followed by TLC (eluent CHCl<sub>3</sub>:EtOAc 4:1). The solid

washed with small portions of cold ethanol and then dried at room temperature to afford the desired product with good purity grade (without recrystallization). The title compound was obtained in 88% yield. Mp=140°C

**IR (KBr):** 1748, 1713, 1577, 1559, 1523, 1392, 1278 cm<sup>-1</sup>.

**<sup>1</sup>H NMR (200 MHz, CDCl<sub>3</sub>):** δ = 0.99 (t, 3H, *J* = 7.4 Hz), 1.43-1.61 (m, 2H), 1.79 (s, 6H), 1.79-1.95 (m, 2H), 3.94 (s, 3H), 4.14 (t, 2H, *J* = 6.8 Hz), 6.94 (d, 1H, *J* = 8.4 Hz), 7.64 (dd, *J* = 8.6, 2.0 Hz, 1H), 8.29 (d, 1H, *J* = 2.0 Hz), 8.36 (s, 1H).

**<sup>13</sup>C NMR (50 MHz, CDCl<sub>3</sub>):** δ = 13.7, 19.1, 27.4, 30.8, 56, 68.9, 104.1, 110.3, 111.4, 116.1, 124.8, 132.6, 148.9, 154.6, 158.3, 160.6, 164.2.

**ESI-MS (70 eV):** *m/z* (%) = 334 (8.4%) [M]<sup>+</sup>; 277 (25.4%), 232 (26.1%), 151 (100%)

Anal. Calcd. C<sub>18</sub>H<sub>22</sub>O<sub>6</sub> (%): C 64.66, H 6.63; Found: C 64.57, H 6.60.

### 3d

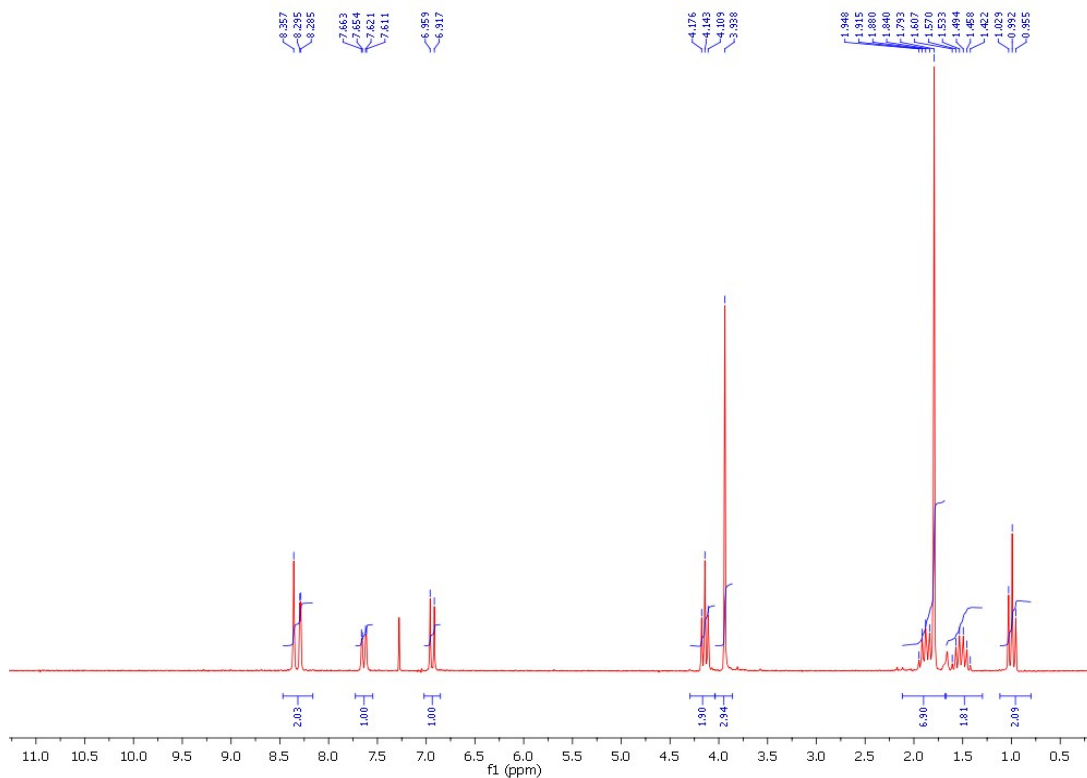

Figure S7 <sup>1</sup>H NMR spectrum of compound 3d

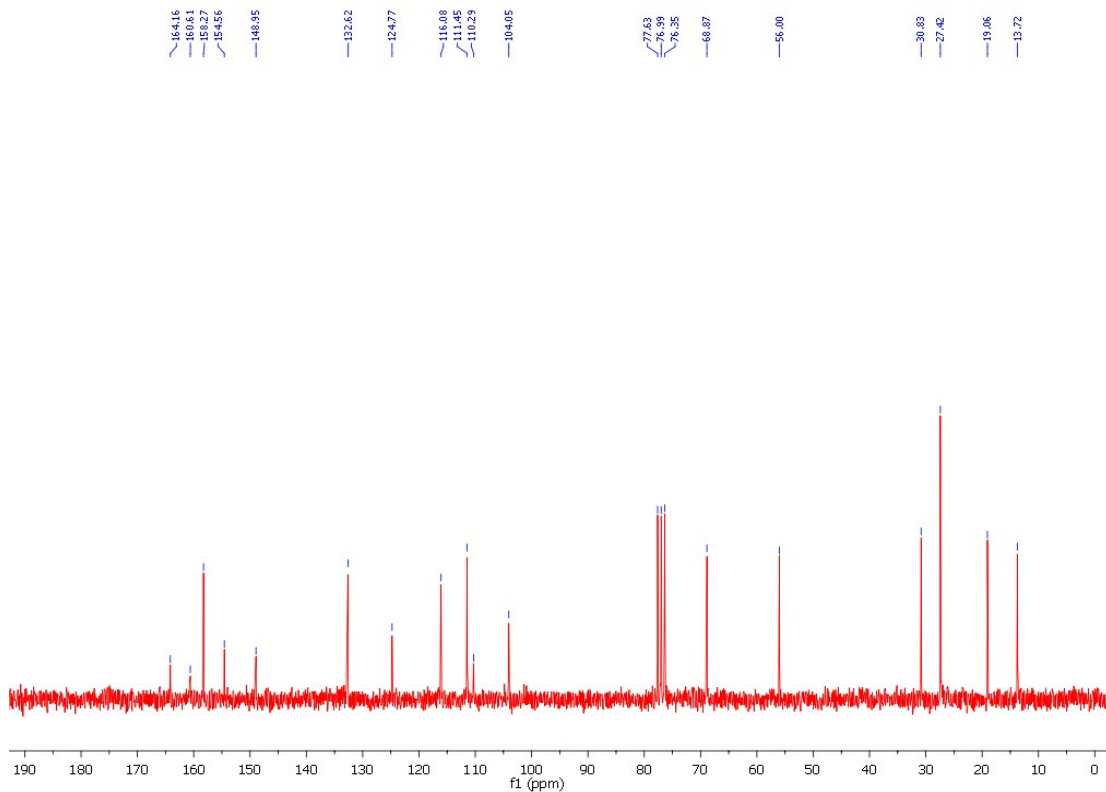

Figure S8  $^{13}\text{C}$  NMR spectrum of compound 3d

(*E*)-5-(4'-(but-2'-enyloxy)-3'-methoxybenzylidenyl)-2,2-dimethyl-1,3-dioxane-4,6-dione, **3e**

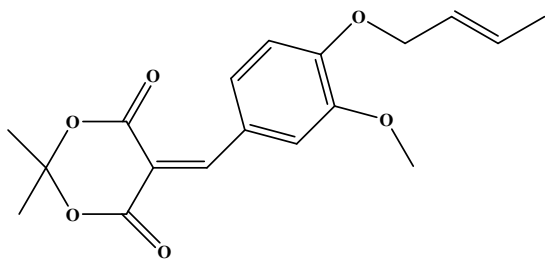

$\text{C}_{18}\text{H}_{20}\text{O}_6$ ; 332.35 g/mol

According to general procedure 1.1 To a mortar are homogenized Meldrum's acid (1.58 g, 11 mmol), then (*E*)-4-(but-2-enyloxy)-3-methoxybenzaldehyde (2.06g, 10 mmol) and finally 5 mol% of PTSA (0.086 g, 0.5 mmol) was added at room temperature. Solid mixture very fast changed the color, white in light green. The reaction was followed by TLC (eluent  $\text{CHCl}_3$ :EtOAc 4:1). The solid washed with small portions of cold ethanol and then dried at room temperature to

afford the desired product with good purity grade (without recrystallization). The title compound was obtained in 96% yield. Mp=155-157°C

**IR (KBr):**1742, 1705, 1546, 1519, 1395, 1286, 1268  $\text{cm}^{-1}$ .

**$^1\text{H}$  NMR (200 MHz,  $\text{CDCl}_3$ ):**  $\delta$  = 1.75-1.79 (m, 9H), 3.94 (s, 3H), 4.65 (d, 1H,  $J$  = 6.0 Hz), 4.79 (d, 1H,  $J$  = 5.0 Hz), 5.77-5.97 (m, 2H), 6.95 (d, 1H,  $J$  = 8.6 Hz), 7.63 (dd,  $J$  = 8.6, 2.0 Hz, 1H), 8.29 (d, 1H,  $J$  = 2.0 Hz), 8.36 (s, 1H).

**$^{13}\text{C}$  NMR (50 MHz,  $\text{CDCl}_3$ ):**  $\delta$  = 17.8, 27.4, 55.9, 69.7, 104, 110.4, 111.8, 115.9, 124.8, 124.9, 131.9, 132.4, 148.9, 154, 158.2, 164.1.

**ESI-MS (70 eV):**  $m/z$  (%) = 332 (45.4%)  $[\text{M}]^+$ ; 277 (69.1%), 230 (45%), 175 (100%)

Anal. Calcd.  $\text{C}_{18}\text{H}_{20}\text{O}_6$  (%): C 65.05, H 6.07; Found: C 64.98, H 6.02.

**3e**

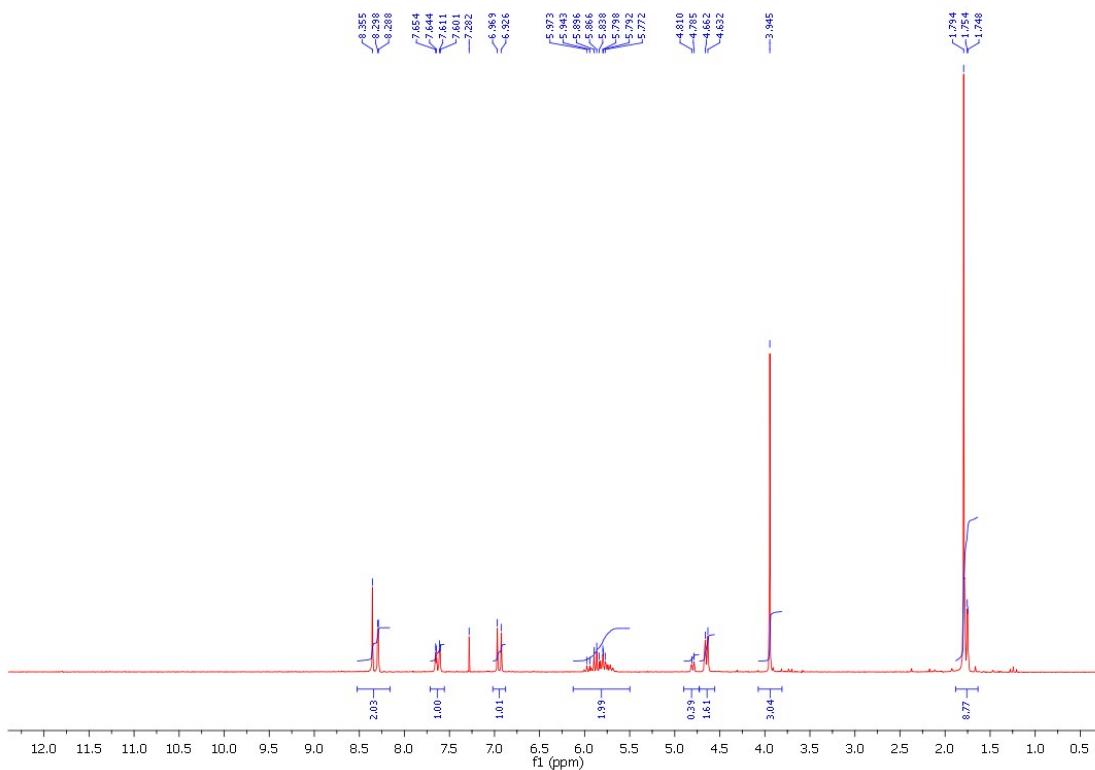

Figure S9  $^1\text{H}$  NMR spectrum of compound 3e

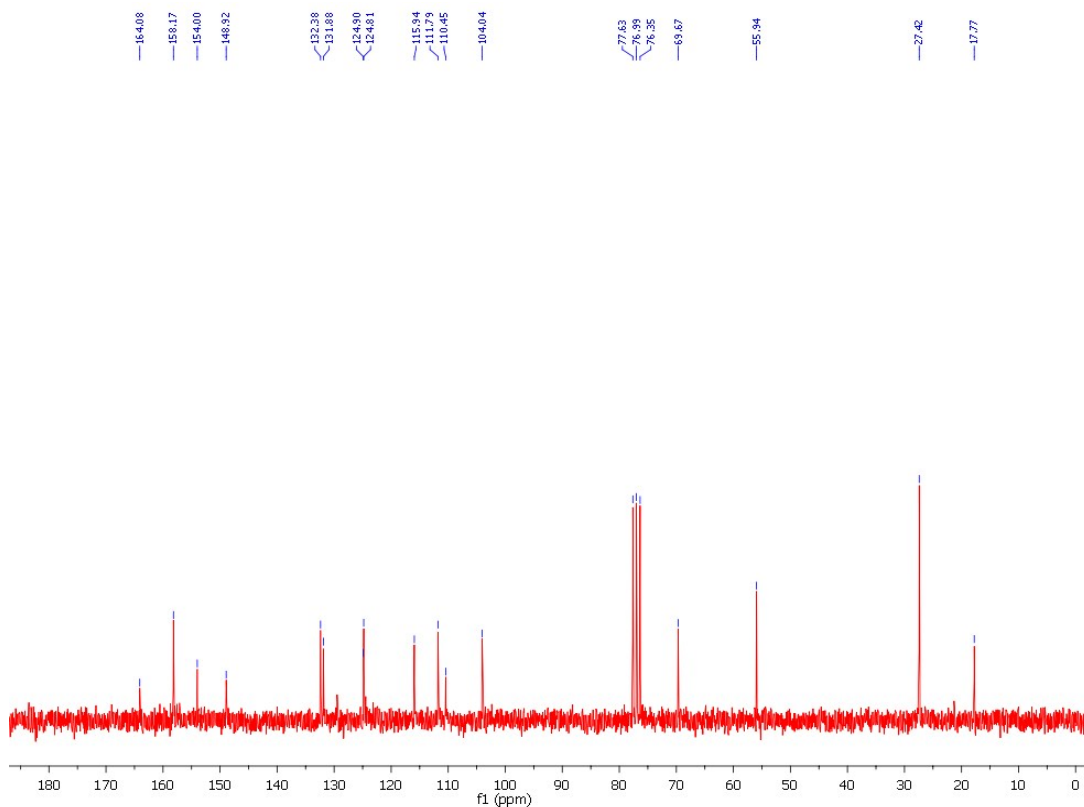

Figure S10  $^{13}\text{C}$  NMR spectrum of compound 3e

5-(4'-acetoxy-3'-methoxybenzylidene)-2,2-dimethyl-1,3-dioxane-4,6-dione, **3f**

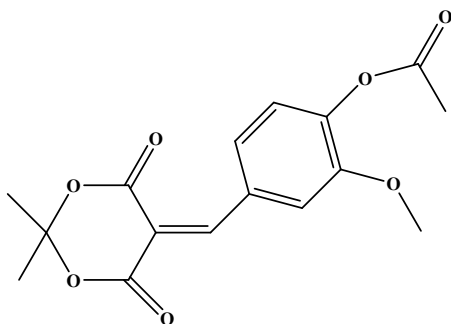

$\text{C}_{16}\text{H}_{16}\text{O}_7$ ; 320.29 g/mol

According to general procedure 1.1 To a mortar are homogenized Meldrum's acid (1.58 g, 11 mmol), then 4-acetoxy-3-methoxybenzaldehyde (1.94 g, 10 mmol) and finally 5 mol% of PTSA (0.086 g, 0.5 mmol) was added at room temperature. Solid mixture very fast changed the color, white in light green. The reaction was followed by TLC (eluent  $\text{CHCl}_3$ :EtOAc 4:1). The solid washed with small portions of cold ethanol and then dried at room temperature to afford the

desired product with good purity grade (without recrystallization). The title compound was obtained in 97% yield. Mp=170°C

**IR (KBr):** 1764, 1732, 1615, 1582, 1513, 1396, 1373, 1282 cm<sup>-1</sup>.

**<sup>1</sup>H NMR (200 MHz, CDCl<sub>3</sub>):** δ = 1.80 (s, 6H), 2.35 (s, 3H), 3.91 (s, 3H), 7.15 (d, 1H, *J* = 8.2 Hz), 7.57 (dd, *J* = 8.2, 2.0 Hz, 1H), 8.22 (s, 1H), 8.36 (s, 1H).

**<sup>13</sup>C NMR (50 MHz, CDCl<sub>3</sub>):** δ = 20.6, 27.5, 56, 104.5, 114.2, 116.9, 122.9, 129.1, 130.3, 144.4, 144.6, 151.1, 157.1, 159.9, 163.3, 168.2.

**ESI-MS (70 eV):** *m/z* (%) = 320 (10.9%) [M]<sup>+</sup>; 277 (52%), 175 (32.5%), 107 (100%)

Anal. Calcd. C<sub>16</sub>H<sub>16</sub>O<sub>7</sub> (%): C 60.00, H 5.04; Found: C 59.95, H 5.01.

### 3f

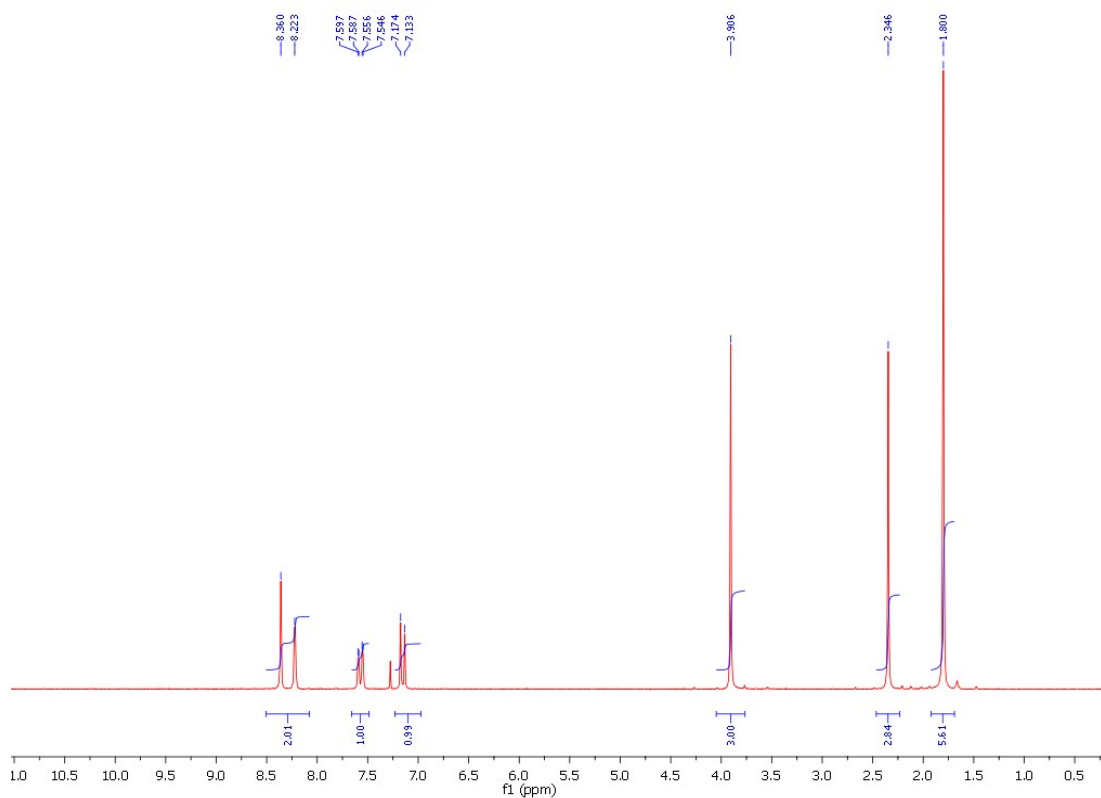

Figure S11 <sup>1</sup>H NMR spectrum of compound 3f

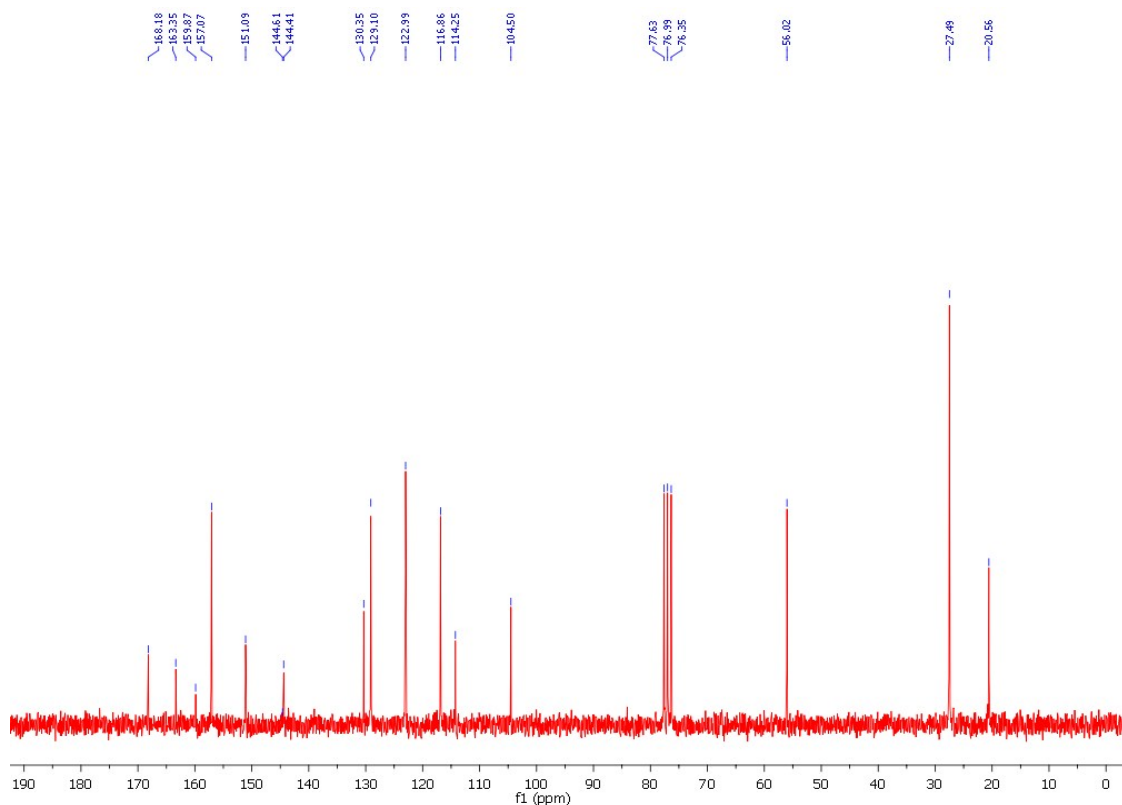

Figure S12  $^{13}\text{C}$  NMR spectrum of compound 3f

Ethyl 2-(4-((2,2-dimethyl-4,6-dioxo-1,3-dioxan-5-ylidene)methyl)-2-methoxyphenoxy)acetate, **3g**

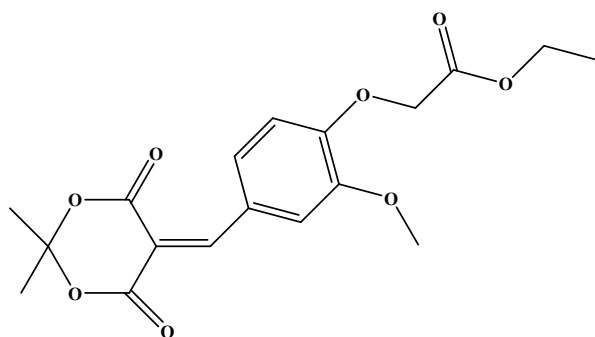

$\text{C}_{18}\text{H}_{20}\text{O}_8$ ; 364.35 g/mol

According to general procedure 1.1 To a mortar are homogenized Meldrum's acid (1.58 g, 11 mmol), then ethyl 2-(4-formyl-2-methoxyphenoxy)acetate (2.38 g, 10 mmol) and finally 5 mol% of PTSA (0.086 g, 0.5 mmol) was added at room temperature. Solid mixture very fast changed the color, white in light green. The reaction was followed by TLC (eluent  $\text{CHCl}_3$ :EtOAc 4:1). The solid washed with small portions of cold ethanol and then dried at room temperature to afford the

desired product with good purity grade (without recrystallization). The title compound was obtained in 95% yield. Mp=104-105°C

**IR (KBr):** 1774, 1748, 1728, 1703, 1577, 1556, 1508, 1384, 1274 cm<sup>-1</sup>.

**<sup>1</sup>H NMR (200 MHz, CDCl<sub>3</sub>):** δ = 1.29 (t, 3H, *J* = 7.0 Hz), 1.79 (s, 6H), 3.96 (s, 3H), 4.28 (q, 2H, *J* = 7.2 Hz), 4.80 (s, 2H), 6.82 (d, 1H, *J* = 8.6 Hz), 7.61 (dd, *J* = 8.6, 2.2 Hz, 1H), 8.29 (d, 1H, *J* = 2.0 Hz), 8.35 (s, 1H).

**<sup>13</sup>C NMR (50 MHz, CDCl<sub>3</sub>):** δ = 14.1, 27.4, 56, 61.6, 65.8, 104.2, 111.5, 112.2, 116.5, 126, 131.5, 148.9, 152.6, 157.8, 160.4, 163.9, 167.8.

**ESI-MS (70 eV):** *m/z* (%) = 364 (5.2%) [M]<sup>+</sup>; 291 (2%), 262 (30.4%), 79 (100%)

Anal. Calcd. C<sub>18</sub>H<sub>20</sub>O<sub>8</sub> (%): C 59.34, H 5.53; Found: C 59.30, H 5.46.

3g

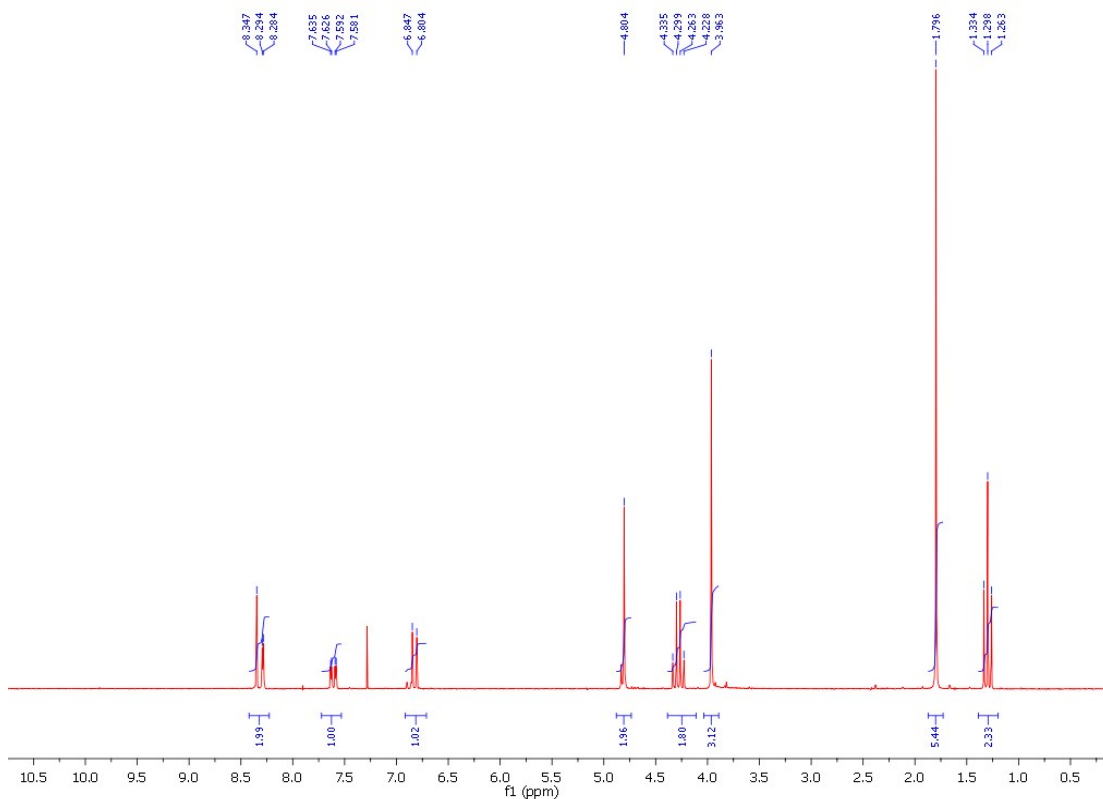

Figure S13 <sup>1</sup>H NMR spectrum of compound 3g



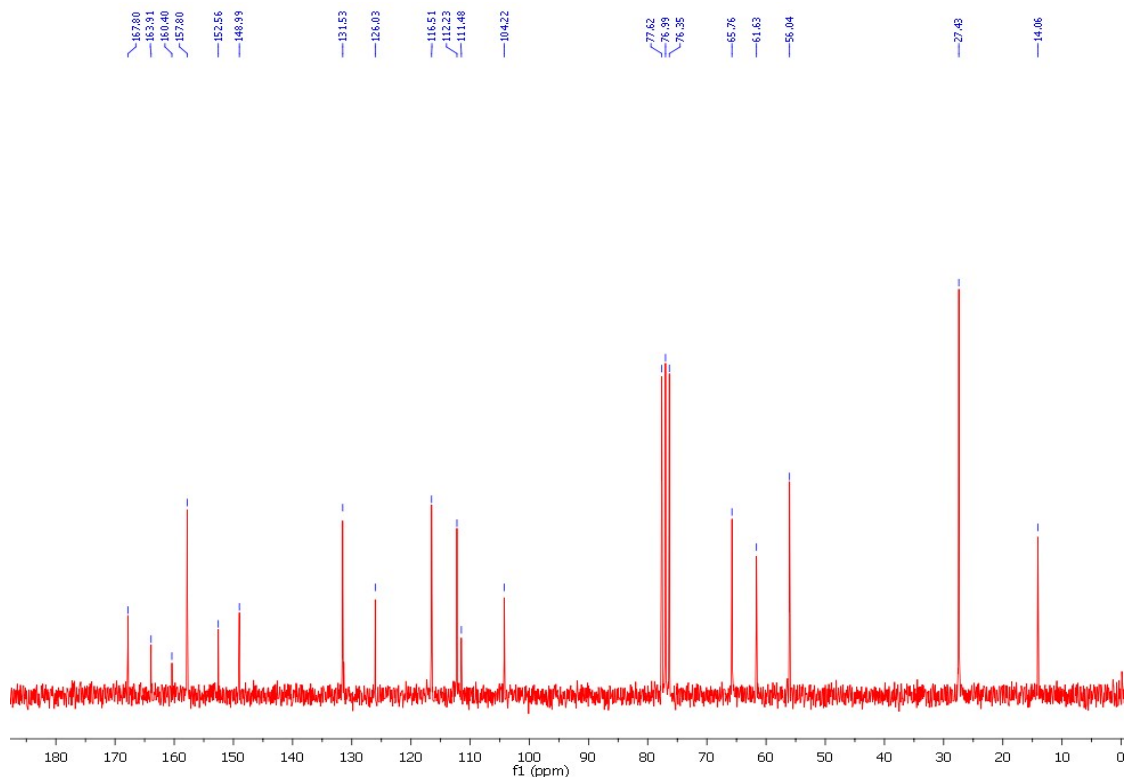

Figure S14  $^{13}\text{C}$  NMR spectrum of compound 3g

5-(4'-bromopropoxy-3'-methoxybenzylidene)-2,2-dimethyl-1,3-dioxane-4,6-dione, **3h**

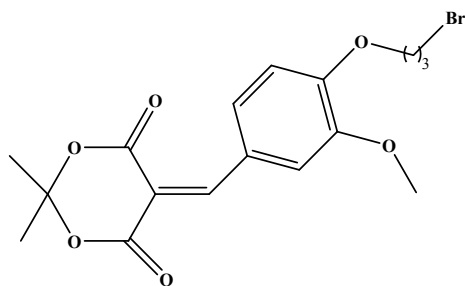

$\text{C}_{17}\text{H}_{19}\text{BrO}_6$ ; 399.23 g/mol

According to general procedure 1.1 To a mortar are homogenized Meldrum's acid (1.58 g, 11 mmol), then 4-(3-bromopropoxy)-3-methoxybenzaldehyde (2.73 g, 10 mmol) and finally 5 mol% of PTSA (0.086 g, 0.5 mmol) was added at room temperature. Solid mixture very fast changed the color, white in light green. The reaction was followed by TLC (eluent  $\text{CHCl}_3$ :EtOAc 4:1). The solid washed with small portions of cold ethanol and then dried at room temperature to afford the desired product with good purity grade (without recrystallization). The title compound was obtained in 91% yield. Mp=135°C

**IR (KBr):** 1748, 1711, 1580, 1563, 1522, 1390, 1273  $\text{cm}^{-1}$ .

**$^1\text{H}$  NMR (200 MHz,  $\text{CDCl}_3$ ):**  $\delta$  = 1.80 (s, 6H), 2.36-2.47 (m, 2H), 3.64 (t, 2H,  $J$  = 6.4 Hz), 3.94 (s, 3H), 4.28 (t, 2H,  $J$  = 6.0 Hz), 6.98 (d, 1H,  $J$  = 8.4 Hz), 7.64 (dd,  $J$  = 8.4, 1.8 Hz, 1H), 8.29 (d, 1H,  $J$  = 2.2 Hz), 8.36 (s, 1H).

**$^{13}\text{C}$  NMR (50 MHz,  $\text{CDCl}_3$ ):**  $\delta$  = 27.5, 29.5, 31.9, 56, 66.5, 104.1, 111.1, 111.8, 116.2, 125.3, 132.3, 149, 153.9, 158.1, 160.6, 164.1.

**ESI-MS (70 eV):**  $m/z$  (%) = 399 (18.3%)  $[\text{M}]^+$ ; 319 (29.7%), 297 (100%) 276 (40.1%)

Anal. Calcd.  $\text{C}_{17}\text{H}_{19}\text{BrO}_6$  (%): C 51.14, H 4.80; Found: C 51.18, H 4.84.

### 3h

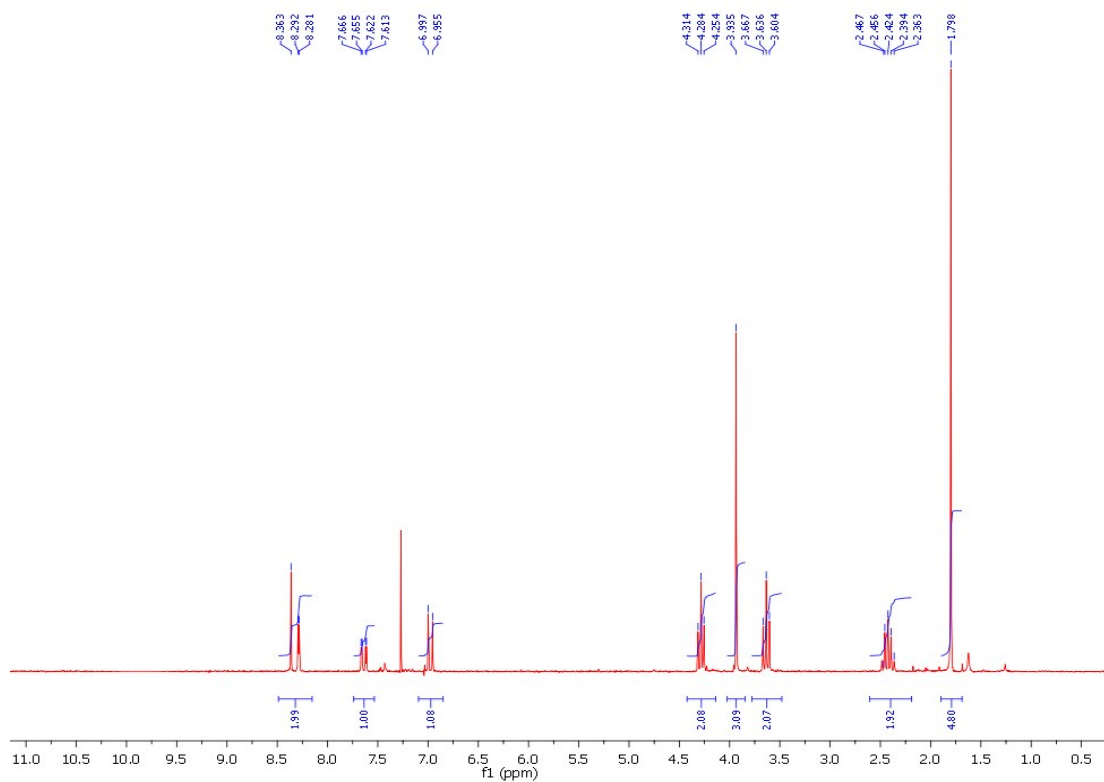

Figure S15  $^1\text{H}$  NMR spectrum of compound 3h

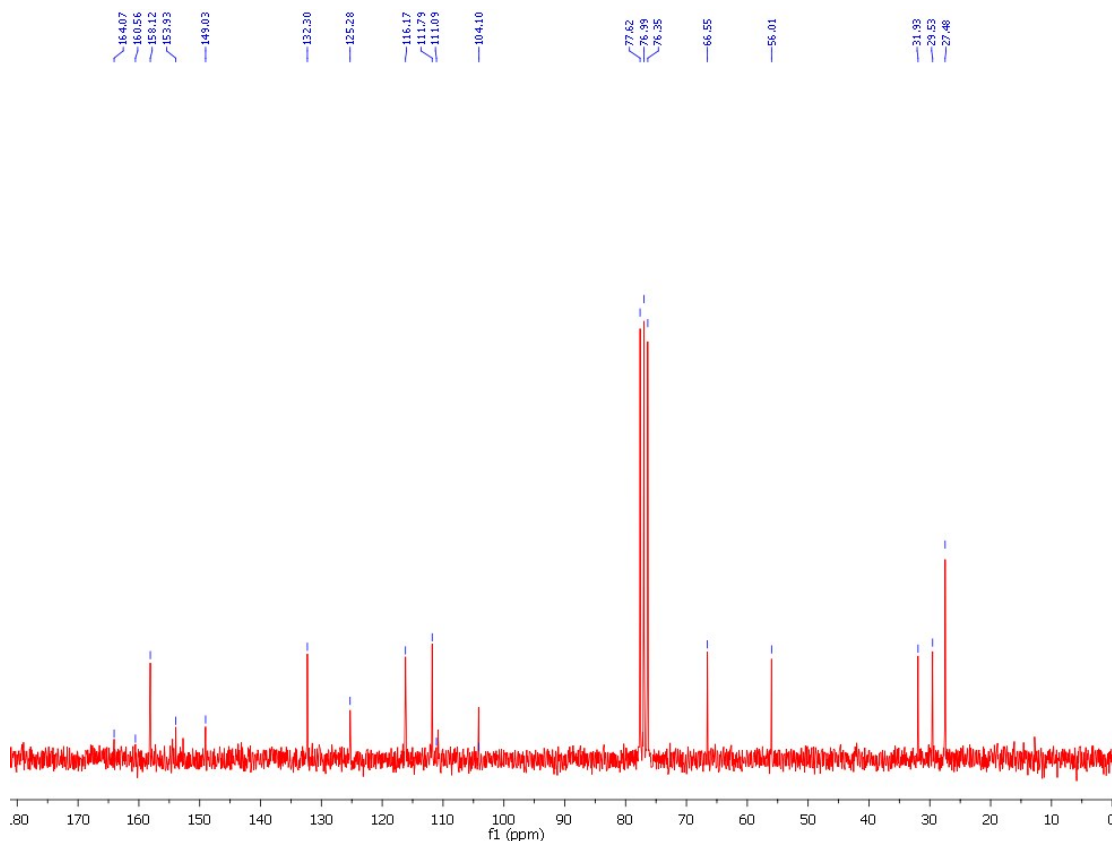

Figure S16  $^{13}\text{C}$  NMR spectrum of compound 3h

5-(4'-bromobutoxy-3'-methoxybenzylidenyl)-2,2-dimethyl-1,3-dioxane-4,6-dione, **3i**

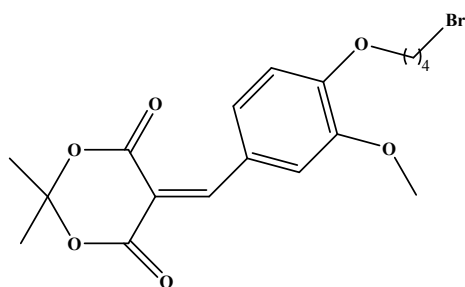

$\text{C}_{18}\text{H}_{21}\text{BrO}_6$ ; 413.26 g/mol

According to general procedure 1.1 To a mortar are homogenized Meldrum's acid (1.58 g, 11 mmol), then 4-(4-bromobutoxy)-3-methoxybenzaldehyde (2.87 g, 10 mmol) and finally 5 mol% of PTSA (0.086 g, 0.5 mmol) was added at room temperature. Solid mixture very fast changed the color, white in light green. The reaction was followed by TLC (eluent  $\text{CHCl}_3$ :EtOAc 4:1). The solid washed with small portions of cold ethanol and then dried at room temperature to afford the

desired product with good purity grade (without recrystallization). The title compound was obtained in 91% yield. Mp=118-121°C

**IR (KBr):** 1748, 1713, 1580, 1563, 1398, 1272 cm<sup>-1</sup>.

**<sup>1</sup>H NMR (200 MHz, CDCl<sub>3</sub>):** δ = 1.80 (s, 6H), 2.06-2.09 (m, 2H), 3.51 (t, 2H, *J* = 6.2 Hz), 3.94 (s, 3H), 4.17 (t, 2H, *J* = 5.8 Hz), 6.93 (d, 1H, *J* = 8.6 Hz), 7.63 (dd, *J* = 8.4, 2.0 Hz, 1H), 8.28 (d, 1H, *J* = 2.2 Hz), 8.35 (s, 1H).

**<sup>13</sup>C NMR (50 MHz, CDCl<sub>3</sub>):** δ = 27.4, 29.2, 33.1, 55.9, 68.1, 104.1, 110.6, 111.5, 116.1, 125, 132.4, 148.9, 154.1, 158.1, 160.5, 164.1.

**ESI-MS (70 eV):** *m/z* (%) = 413 (35.4%) [M]<sup>+</sup>; 313 (86.2%), 311 (100%), 277 (34.1%)

Anal. Calcd. C<sub>18</sub>H<sub>21</sub>BrO<sub>6</sub> (%): C 52.31, H 5.12; Found: C 52.28, H 5.15.

**3i**

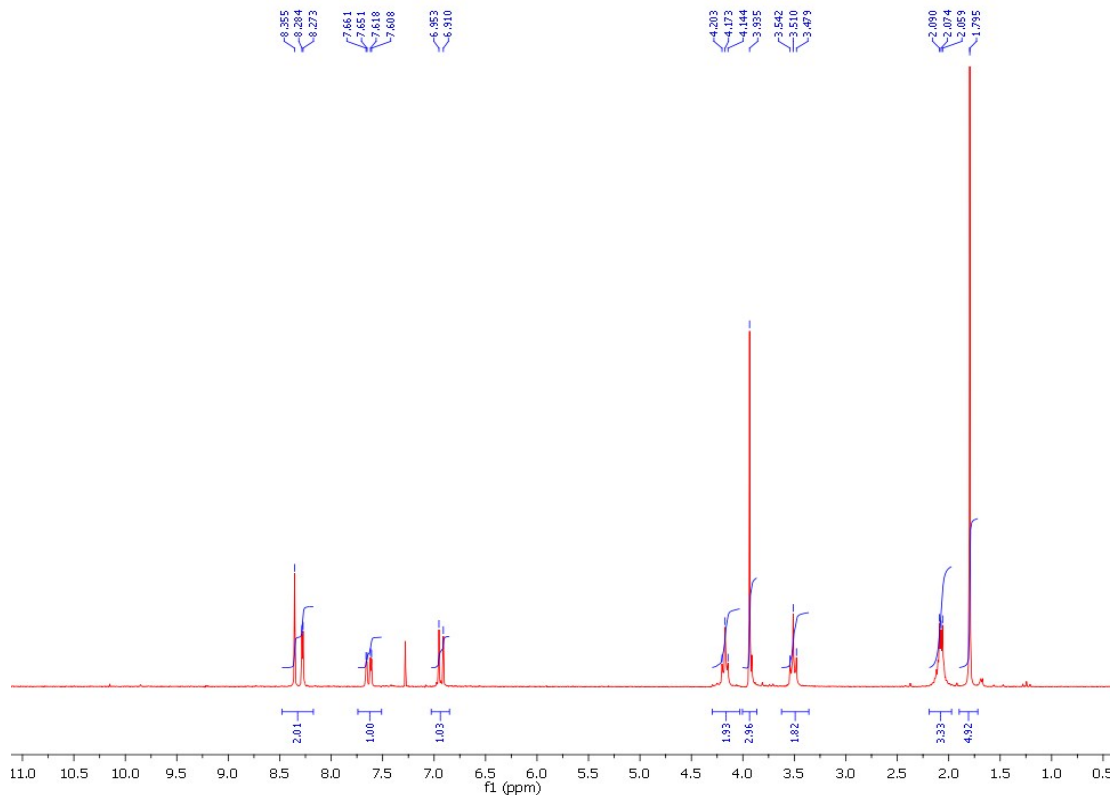

Figure S17 <sup>1</sup>H NMR spectrum of compound 3i

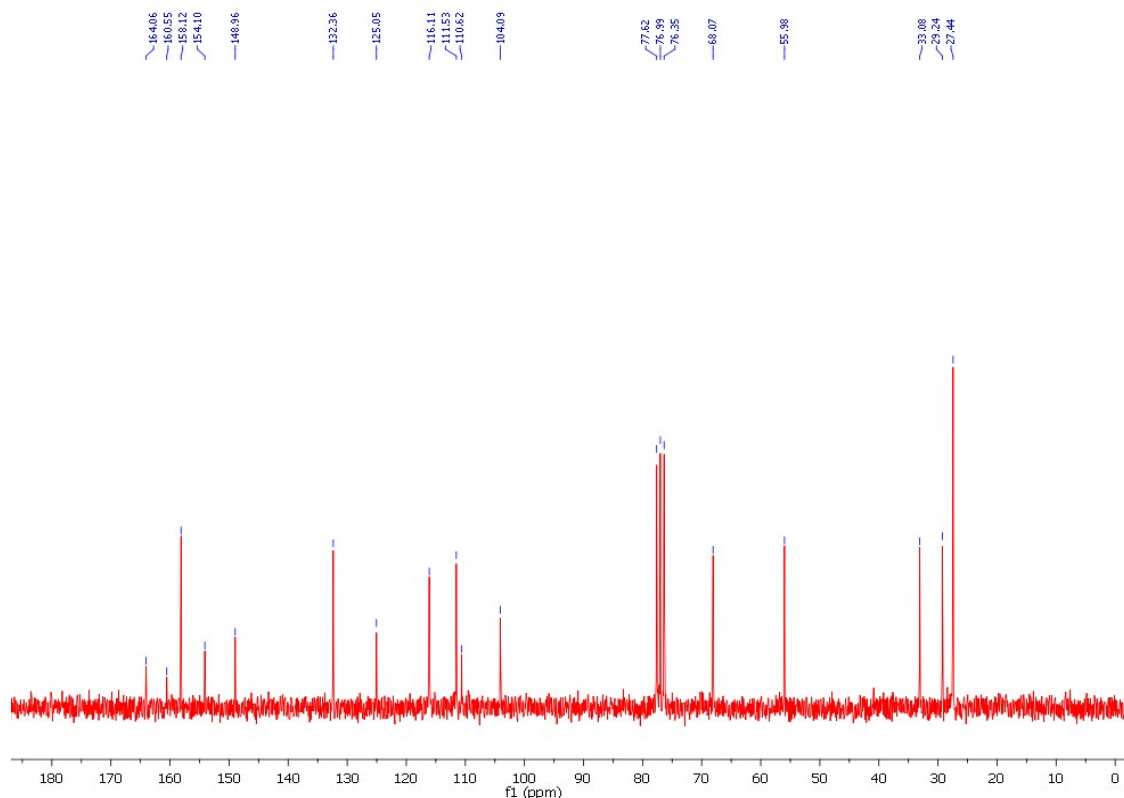

Figure S18  $^{13}\text{C}$  NMR spectrum of compound **3i**

5-(4'-bromopentyloxy-3'-methoxybenzylidenyl)-2,2-dimethyl-1,3-dioxane-4,6-dione, **3j**

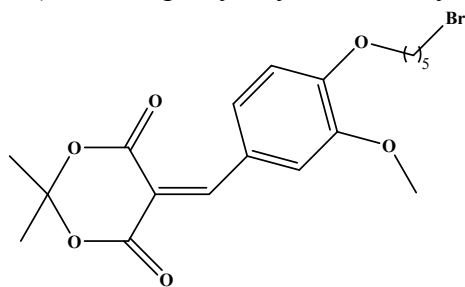

$\text{C}_{19}\text{H}_{23}\text{BrO}_6$ ; 427.29 g/mol

According to general procedure 1.1 To a mortar are homogenized Meldrum's acid (1.58 g, 11 mmol), then 4-(5-bromopentyloxy)-3-methoxybenzaldehyde (3.01 g, 10 mmol) and finally 5 mol% of PTSA (0.086 g, 0.5 mmol) was added at room temperature. Solid mixture very fast changed the color, white in light green. The reaction was followed by TLC (eluent  $\text{CHCl}_3$ :EtOAc 4:1). The solid washed with small portions of cold ethanol and then dried at room temperature to afford the desired product with good purity grade (without recrystallization). The title compound was obtained in 91% yield.  $\text{Mp}=103\text{-}105^\circ\text{C}$ .

**IR (KBr):** 1748, 1713, 1578, 1561, 1523, 1391, 1273  $\text{cm}^{-1}$ .

**$^1\text{H}$  NMR (200 MHz,  $\text{CDCl}_3$ ):**  $\delta$  = 1.65-1.76 (m, 2H), 1.79 (s, 6H), 1.83-2.03 (m, 4H), 3.45 (t, 2H,  $J$  = 6.8 Hz), 3.94 (s, 3H), 4.15 (t, 2H,  $J$  = 6.6 Hz), 6.93 (d, 1H,  $J$  = 8.6 Hz), 7.64 (dd,  $J$  = 8.6, 2.0 Hz, 1H), 8.28 (d, 1H,  $J$  = 2.0 Hz), 8.35 (s, 1H).

**$^{13}\text{C}$  NMR (50 MHz,  $\text{CDCl}_3$ ):**  $\delta$  = 24.6, 27.4, 28, 32.3, 33.3, 55.9, 68.8, 104.1, 110.5, 111.5, 116.1, 124.9, 132.4, 148.9, 154.2, 158.1, 160.6, 164.1.

**ESI-MS (70 eV):**  $m/z$  (%) = 427 (37.8%)  $[\text{M}]^+$ ; 325 (80%), 261 (100%), 166 (48.2%)

Anal. Calcd.  $\text{C}_{19}\text{H}_{23}\text{BrO}_6$  (%): C 53.41, H 5.43; Found: C 53.20, H 5.38.

**3j**

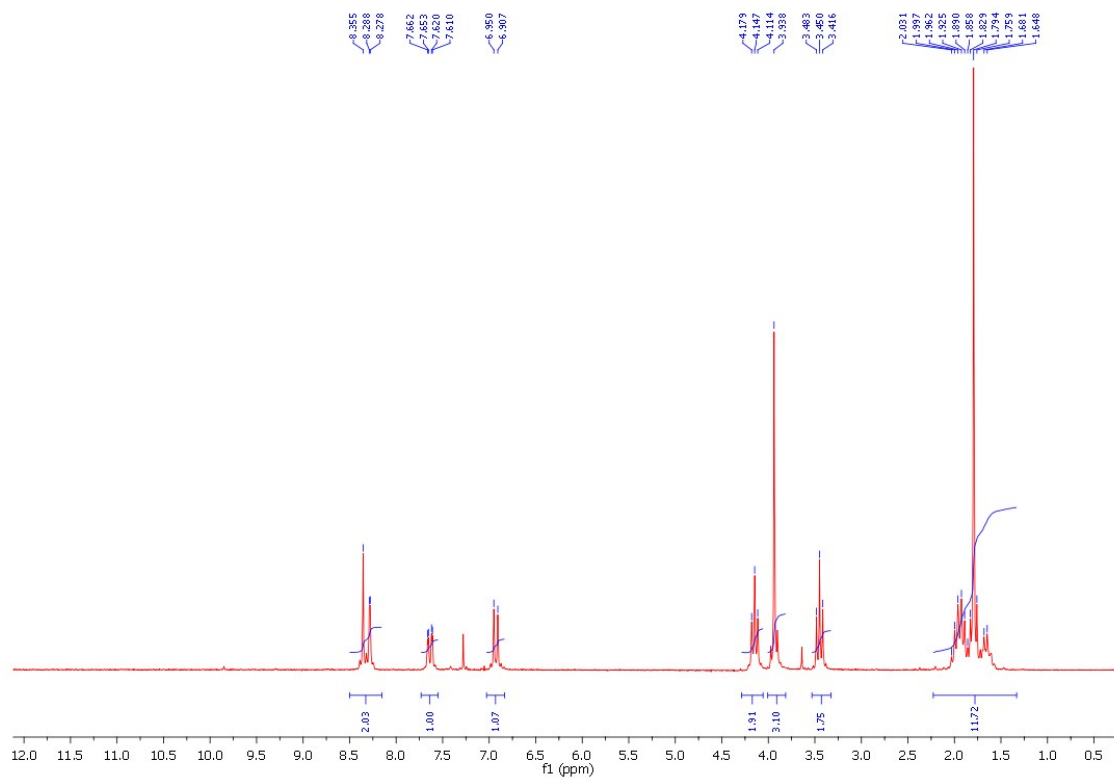

Figure S19  $^1\text{H}$  NMR spectrum of compound 3j

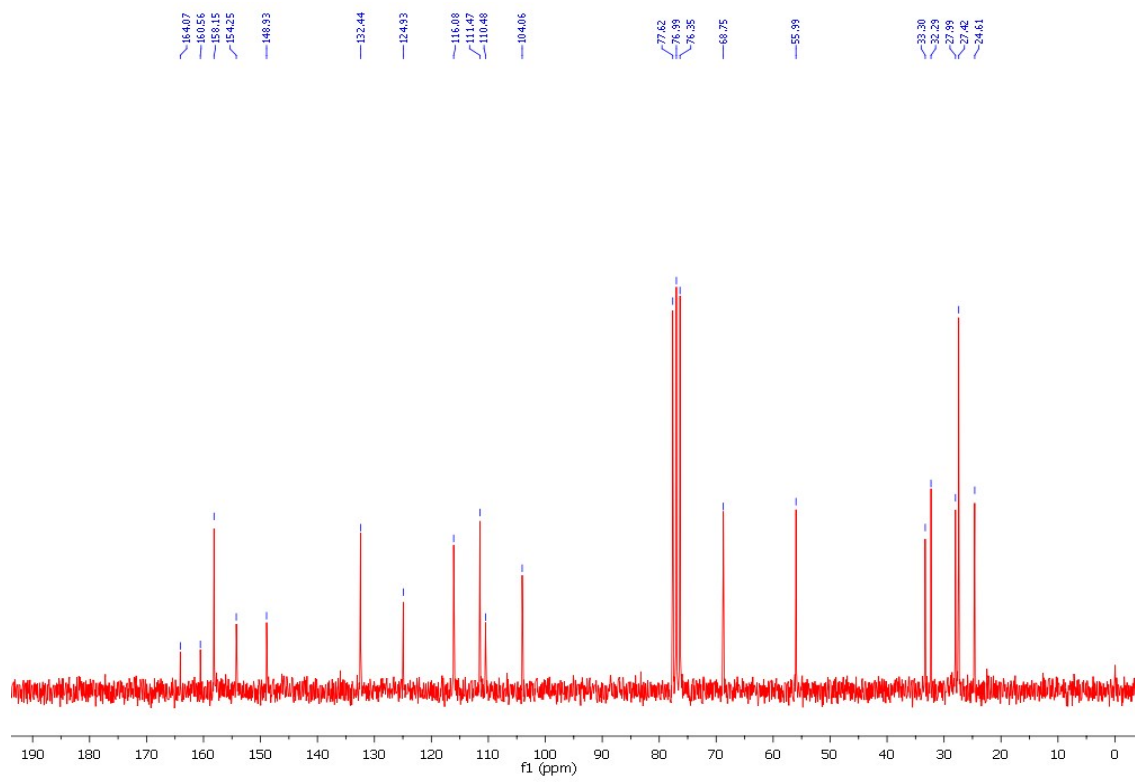

Figure S20 <sup>13</sup>C NMR spectrum of compound 3j
